# Supplementary material for: Systemic and intratumoral balances between monocytes/macrophages and lymphocytes predict prognosis in hepatocellular carcinoma patients after surgery
Source: PubMed Central journal article supplement (PMC5058730; doi:10.18632/oncotarget.9049), 2016-04-27
Supplement: oncotarget-07-30951-s001.pdf [file oncotarget-07-30951-s001.pdf]

# Systemic and intratumoral balances between monocytes/macrophages and lymphocytes predict prognosis in hepatocellular carcinoma patients after surgery

## Supplementary Materials

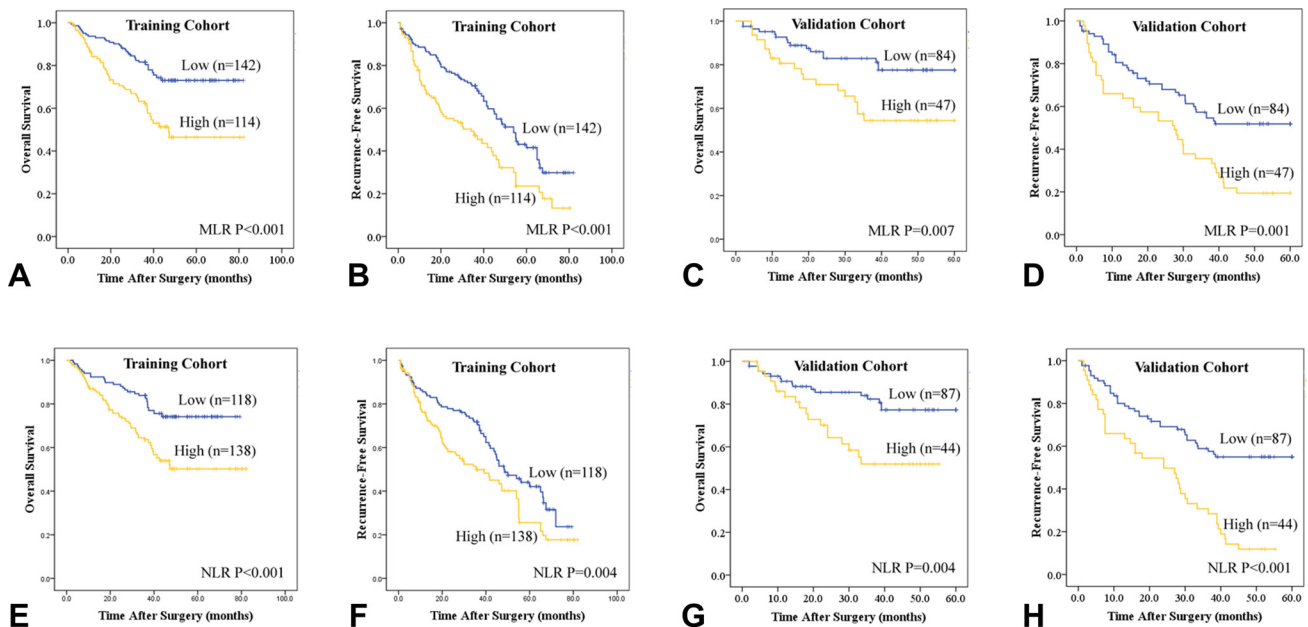

Supplementary Figure S1: Comparison of overall survival (OS, A, C, E, and G) and recurrence-free survival (RFS, B, D, F, and H) based on peripheral monocyte to lymphocyte ratio (MLR, A–D) and neutrophil to lymphocyte ratio (NLR, E–H) in the training (A, B, E, and F) and validation cohorts (C, D, G, and H).

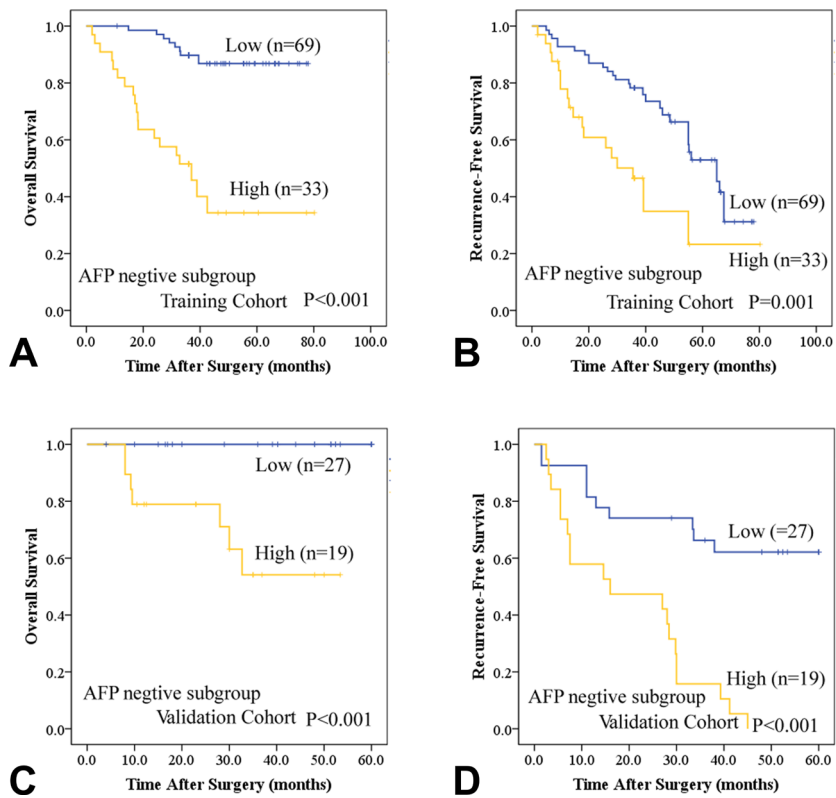

**Supplementary Figure S2: Kaplan-Meier analyses of overall survival (OS, A and C) and recurrence-free survival (RFS, B and D) based on peripheral neutrophil and monocyte to lymphocyte ratio (NMLR) in the negative AFP subgroup in the training (A and B) and validation cohorts (C and D).**

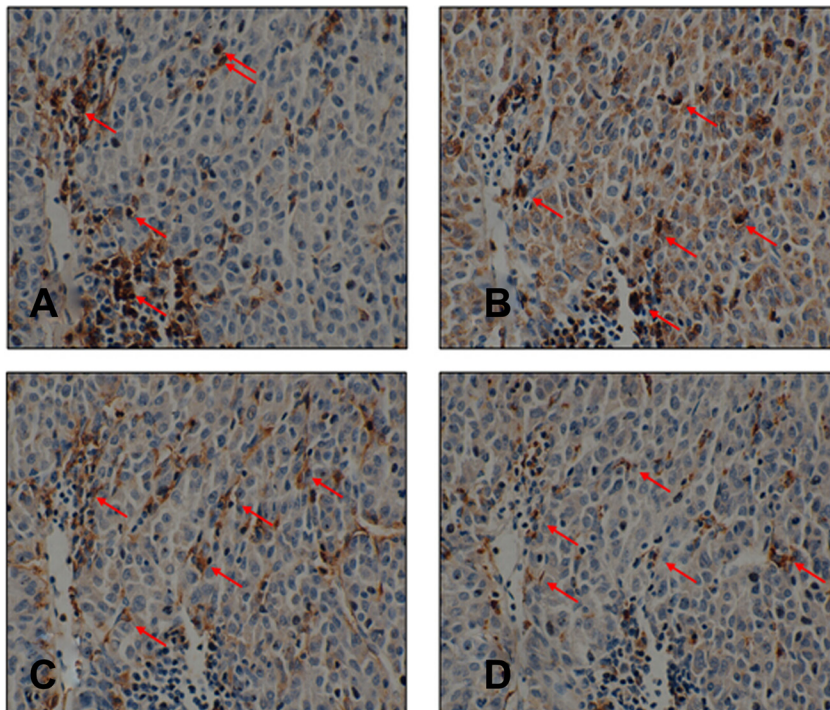

**Supplementary Figure S3: Immunohistochemical staining of intratumoral CD4 (A), CD8 (B), CD16 (C), and CD68 (D) in a representative case. Positive cells are stained brown (red arrows, 200 $\times$ ).**

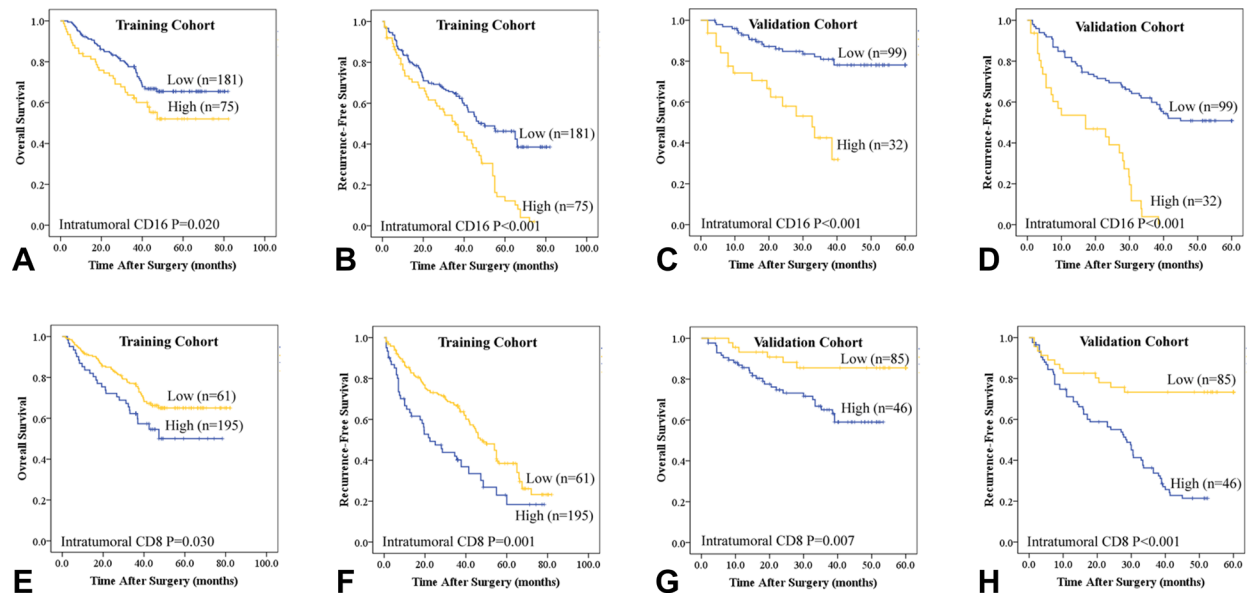

**Supplementary Figure S4: Prognostic significance of CD16 and CD8 in HCC patients undergoing resection.** Kaplan-Meier analyses showed the overall survival (OS, A, C, E, and G) and recurrence-free survival (RFS, B, D, F, and H) based on CD16 (A–D) and CD8 (E–H) in the training (A, B, E, and F) and validation cohorts (C, D, G, and H).

**Supplementary Table S1: Univariate and multivariate analyses for early recurrence subgroups**

| Factors                                   | Training Cohort (n = 81) |                     | Validation Cohort (n = 48) |                   |                      |              |
|-------------------------------------------|--------------------------|---------------------|----------------------------|-------------------|----------------------|--------------|
|                                           | Univariate               | Multivariate        | Univariate                 | Multivariate      |                      |              |
|                                           | P                        | HR (95% CI)         | P                          | P                 | HR (95% CI)          | P            |
| Tumor size, cm<br>(≤ 5.0 vs > 5.0)        | <b>0.05</b>              |                     | 0.666                      | 0.135             |                      | NA           |
| Tumor number<br>(Single vs Multiple)      | 0.105                    |                     | NA                         | <b>0.016</b>      |                      | 0.131        |
| Tumor differentiation<br>(I–II vs III–IV) | 0.144                    |                     | NA                         | <b>&lt; 0.001</b> | 0.017 (0.000–0.843)  | <b>0.041</b> |
| BCLC stage<br>(0/A vs B/C)                | <b>0.025</b>             | 1.971 (1.039–3.742) | <b>0.038</b>               | <b>0.015</b>      |                      | 0.052        |
| NLR (≤ 2.5 vs > 2.5)                      | 0.684                    |                     | NA                         | <b>0.017</b>      |                      | 0.189        |
| MLR (≤ 0.3 vs > 0.3)                      | 0.142                    |                     | NA                         | <b>0.05</b>       |                      | 0.183        |
| NMLR (≤ 1.2 vs > 1.2)                     | <b>0.012</b>             | 2.072 (1.126–3.811) | <b>0.019</b>               | <b>&lt; 0.001</b> | 5.478 (1.848–16.238) | <b>0.010</b> |

Univariate analysis: Kaplan-Meier method; multivariate analysis: Cox proportional hazards regression model.  
Abbreviations: HR: Hazard Ratio; BCLC: Barcelona clinic liver cancer; NLR: neutrophil to lymphocyte ratio; MLR: monocyte to lymphocyte ratio; NMLR: neutrophil and monocyte to lymphocyte ratio; NA: not adopted.

**Supplementary Table S2: Univariate and multivariate analyses of prognostic factors in the validation cohort (n = 131)**

| Factors                                   | RFS               |                     |                   | OS                |                      |                   |
|-------------------------------------------|-------------------|---------------------|-------------------|-------------------|----------------------|-------------------|
|                                           | Univariate        | Multivariate        |                   | Univariate        | Multivariate         |                   |
|                                           | <i>P</i>          | HR (95% CI)         | <i>P</i>          | <i>P</i>          | HR (95% CI)          | <i>P</i>          |
| Age, year<br>(≤ 50 vs > 50)               | 0.234             |                     | NA                | 0.055             |                      | NA                |
| Gender<br>(Female vs Male)                | 0.645             |                     | NA                | 0.323             |                      | NA                |
| ALT, U/L<br>(≤ 40 vs > 40)                | 0.477             |                     | NA                | 0.340             |                      | NA                |
| Liver cirrhosis<br>(Yes vs No)            | 0.151             |                     | NA                | 0.733             |                      | NA                |
| HBsAg<br>(Positive vs Negative)           | 0.530             |                     | NA                | 0.621             |                      | NA                |
| AFP, ng/ml<br>(≤ 20 vs > 20)              | 0.508             |                     | NA                | 0.055             |                      | NA                |
| Platelet count, 109/L<br>(≤ 100 vs > 100) | 0.192             |                     | NA                | 0.033             |                      | 0.161             |
| Tumor encapsulation<br>(Yes vs No)        | 0.361             |                     | NA                | 0.335             |                      | NA                |
| Tumor number<br>(Single vs Multiple)      | 0.446             |                     | NA                | 0.771             |                      | NA                |
| Vascular invasion<br>(Yes vs No)          | <b>0.008</b>      | 2.515 (1.257–5.030) | <b>0.009</b>      | 0.001             | 6.408 (2.526–16.254) | <b>&lt; 0.001</b> |
| Tumor differentiation<br>(I–II vs III–IV) | 0.212             |                     | NA                | 0.877             |                      | NA                |
| Tumor size, cm<br>(≤ 5.0 vs > 5.0)        | <b>0.012</b>      | 2.192 (1.332–3.610) | <b>0.002</b>      | <b>&lt; 0.001</b> | 6.154 (2.982–12.699) | <b>&lt; 0.001</b> |
| TNM stage<br>(I vs II–III)                | <b>0.006</b>      |                     | 0.951             | <b>0.001</b>      |                      | 0.801             |
| BCLC stage<br>(0/A vs B/C)                | <b>0.004</b>      |                     | 0.192             | <b>&lt; 0.001</b> |                      | 0.988             |
| NLR (≤ 2.5 vs > 2.5)                      | <b>&lt; 0.001</b> |                     | 0.064             | <b>0.004</b>      |                      | 0.699             |
| MLR (≤ 0.3 vs > 0.3)                      | <b>0.001</b>      |                     | 0.916             | <b>0.007</b>      |                      | 0.790             |
| NMLR (≤ 1.2 vs > 1.2)                     | <b>&lt; 0.001</b> | 3.044 (1.864–4.972) | <b>&lt; 0.001</b> | <b>&lt; 0.001</b> | 4.403 (2.104–9.215)  | <b>&lt; 0.001</b> |
| Intratumoral CD16                         | <b>&lt; 0.001</b> | 3.422 (2.018–5.803) | <b>&lt; 0.001</b> | <b>&lt; 0.001</b> | 2.407 (1.118–5.179)  | <b>0.025</b>      |
| Intratumoral CD8                          | <b>&lt; 0.001</b> | 0.412 (0.217–0.784) | <b>0.007</b>      | <b>0.007</b>      |                      | <b>0.624</b>      |
| Intratumoral CD16/CD8<br>(≤ 1.1 vs > 1.1) | <b>&lt; 0.001</b> |                     | 0.068             | <b>0.001</b>      | 2.337 (1.018–5.364)  | <b>0.045</b>      |

Univariate analysis: Kaplan-Meier method; multivariate analysis: Cox proportional hazards regression model. Abbreviations: RFS: Recurrence-Free Survival; OS: overall survival; ALT: alanine aminotransferase; HBsAg: hepatitis B surface antigen; AFP: alpha fetoprotein; TNM: tumor-nodes-metastasis; NLR: neutrophil to lymphocyte ratio; MLR: monocyte to lymphocyte ratio; NMLR: neutrophil and monocyte to lymphocyte ratio; NA: not adopted.

**Supplementary Table S3: Correlation between NMLR and clinicopathological characteristics of patients in the training and validation cohorts**

| Characteristics        |          | NMLR                         |       |                |                                |       |              |
|------------------------|----------|------------------------------|-------|----------------|--------------------------------|-------|--------------|
|                        |          | Training Cohort<br>(n = 256) |       |                | Validation Cohort<br>(n = 131) |       |              |
|                        |          | ≤ 1.2                        | > 1.2 | P              | ≤ 1.2                          | > 1.2 | P            |
| Age (year)             | ≤ 50     | 61                           | 46    | 0.703          | 42                             | 20    | 1.000        |
|                        | > 50     | 81                           | 68    |                | 47                             | 22    |              |
| Gender                 | Female   | 21                           | 21    | 0.498          | 6                              | 12    | <b>0.002</b> |
|                        | Male     | 121                          | 93    |                | 83                             | 30    |              |
| ALT (U/L)              | ≤ 40     | 85                           | 51    | <b>0.017</b>   | 50                             | 19    | 0.265        |
|                        | > 40     | 57                           | 63    |                | 39                             | 23    |              |
| Liver cirrhosis        | Yes      | 123                          | 100   | 0.853          | 83                             | 40    | 1.000        |
|                        | No       | 19                           | 14    |                | 6                              | 2     |              |
| HBsAg                  | Positive | 110                          | 98    | 0.107          | 76                             | 40    | 0.142        |
|                        | Negative | 32                           | 16    |                | 13                             | 2     |              |
| AFP (ng/ml)            | ≤ 20     | 63                           | 39    | 0.123          | 27                             | 19    | 0.118        |
|                        | > 20     | 79                           | 75    |                | 62                             | 23    |              |
| Platelet count (109/L) | ≤ 100    | 31                           | 25    | 1.000          | 28                             | 13    | 1.000        |
|                        | > 100    | 111                          | 89    |                | 61                             | 29    |              |
| Tumor number           | Single   | 130                          | 92    | <b>0.015</b>   | 80                             | 38    | 1.000        |
|                        | Multiple | 12                           | 22    |                | 9                              | 4     |              |
| Vascular invasion      | Yes      | 41                           | 40    | 0.344          | 13                             | 5     | 0.790        |
|                        | No       | 101                          | 74    |                | 76                             | 37    |              |
| Tumor differentiation  | I/II     | 111                          | 81    | 0.195          | 61                             | 34    | 0.149        |
|                        | I/II     | 31                           | 33    |                | 28                             | 8     |              |
| Tumor encapsulation    | Yes      | 83                           | 58    | 0.256          | 47                             | 18    | 0.350        |
|                        | No       | 59                           | 56    |                | 42                             | 24    |              |
| Tumor size (cm)        | ≤ 5.0    | 108                          | 64    | <b>0.001</b>   | 62                             | 26    | 0.427        |
|                        | > 5.0    | 34                           | 50    |                | 27                             | 16    |              |
| TNM stage              | I        | 105                          | 72    | 0.077          | 65                             | 22    | <b>0.029</b> |
|                        | II/III   | 37                           | 42    |                | 24                             | 20    |              |
| BCLC stage             | 0/A      | 82                           | 37    | < <b>0.001</b> | 50                             | 20    | 0.453        |
|                        | B/C      | 60                           | 77    |                | 39                             | 22    |              |

Abbreviations: NMLR: neutrophil and monocyte to lymphocyte ratio; ALT: alanine aminotransferase; HBsAg: hepatitis B surface antigen; AFP: alpha fetoprotein; TNM: tumor node metastasis; BCLC: Barcelona clinic liver cancer.

**Supplementary Table S4: Correlation between NLR and MLR and clinicopathological characteristics of patients in the training and validation cohorts**

| Characteristics        |          | NLR                       |       |              |                             |       |       | MLR                       |       |                   |                             |       |              |
|------------------------|----------|---------------------------|-------|--------------|-----------------------------|-------|-------|---------------------------|-------|-------------------|-----------------------------|-------|--------------|
|                        |          | Training Cohort (n = 256) |       |              | Validation Cohort (n = 131) |       |       | Training Cohort (n = 256) |       |                   | Validation Cohort (n = 131) |       |              |
|                        |          | ≤ 2.5                     | > 2.5 | P            | ≤ 2.5                       | > 2.5 | P     | ≤ 0.3                     | > 0.3 | P                 | ≤ 0.3                       | > 0.3 | P            |
|                        |          |                           |       |              |                             |       |       |                           |       |                   |                             |       |              |
| Age (year)             | ≤ 50     | 49                        | 58    | 1.000        | 43                          | 19    | 0.580 | 44                        | 63    | 0.374             | 40                          | 22    | 1.000        |
|                        | > 50     | 69                        | 80    |              | 44                          | 25    |       | 70                        | 79    |                   | 44                          | 25    |              |
| Gender                 | Female   | 15                        | 27    | 0.176        | 79                          | 34    | 0.057 | 25                        | 17    | <b>0.041</b>      | 76                          | 37    | 0.070        |
|                        | Male     | 103                       | 111   |              | 8                           | 10    |       | 89                        | 125   |                   | 8                           | 10    |              |
| ALT (U/L)              | ≤ 40     | 59                        | 77    | 0.381        | 46                          | 23    | 1.000 | 54                        | 82    | 0.103             | 48                          | 21    | 0.203        |
|                        | > 40     | 59                        | 61    |              | 41                          | 21    |       | 60                        | 60    |                   | 36                          | 26    |              |
| Liver cirrhosis        | Yes      | 102                       | 121   | 0.852        | 81                          | 42    | 0.717 | 103                       | 120   | 0.192             | 77                          | 46    | 0.258        |
|                        | No       | 16                        | 17    |              | 6                           | 2     |       | 11                        | 22    |                   | 7                           | 1     |              |
| HBsAg                  | Positive | 91                        | 117   | 0.148        | 75                          | 41    | 0.384 | 97                        | 111   | 0.198             | 13                          | 2     | 0.083        |
|                        | Negative | 27                        | 21    |              | 12                          | 3     |       | 17                        | 31    |                   | 71                          | 45    |              |
| AFP (ng/ml)            | ≤ 20     | 48                        | 54    | 0.898        | 27                          | 19    | 0.180 | 41                        | 61    | 0.304             | 26                          | 20    | 0.189        |
|                        | > 20     | 70                        | 84    |              | 60                          | 25    |       | 73                        | 81    |                   | 58                          | 27    |              |
| Platelet count (109/L) | ≤ 100    | 16                        | 40    | <b>0.004</b> | 27                          | 14    | 1.000 | 23                        | 33    | 0.649             | 25                          | 16    | 0.695        |
|                        | > 100    | 102                       | 98    |              | 60                          | 30    |       | 91                        | 109   |                   | 59                          | 31    |              |
| Tumor number           | Single   | 104                       | 118   | 0.583        | 80                          | 38    | 0.359 | 92                        | 130   | <b>0.015</b>      | 74                          | 44    | 0.376        |
|                        | Multiple | 14                        | 20    |              | 7                           | 6     |       | 22                        | 12    |                   | 10                          | 3     |              |
| Vascular invasion      | Yes      | 79                        | 96    | 0.687        | 12                          | 6     | 1.000 | 42                        | 39    | 0.137             | 14                          | 4     | 0.290        |
|                        | No       | 39                        | 42    |              | 75                          | 38    |       | 72                        | 103   |                   | 70                          | 43    |              |
| Tumor differentiation  | I-II     | 89                        | 103   | 1.000        | 60                          | 35    | 0.221 | 82                        | 110   | 0.314             | 59                          | 36    | 0.541        |
|                        | III-IV   | 29                        | 35    |              | 27                          | 9     |       | 32                        | 32    |                   | 25                          | 11    |              |
| Tumor encapsulation    | Yes      | 65                        | 76    | 1.000        | 43                          | 22    | 1.000 | 59                        | 82    | 0.377             | 43                          | 22    | 0.716        |
|                        | No       | 53                        | 62    |              | 44                          | 22    |       | 55                        | 60    |                   | 41                          | 25    |              |
| Tumor size (cm)        | ≤ 5.0    | 84                        | 88    | 0.231        | 59                          | 29    | 0.846 | 65                        | 107   | <b>0.002</b>      | 56                          | 32    | 1.000        |
|                        | > 5.0    | 34                        | 50    |              | 28                          | 15    |       | 49                        | 35    |                   | 28                          | 15    |              |
| TNM stage              | I        | 82                        | 95    | 1.000        | 59                          | 28    | 0.697 | 71                        | 106   | <b>0.041</b>      | 62                          | 25    | <b>0.021</b> |
|                        | II-III   | 36                        | 43    |              | 28                          | 16    |       | 43                        | 36    |                   | 22                          | 22    |              |
| BCLC stage             | 0/A      | 61                        | 58    | 0.133        | 48                          | 22    | 0.584 | 38                        | 81    | <b>&lt; 0.001</b> | 43                          | 27    | 0.584        |
|                        | B/C      | 57                        | 80    |              | 39                          | 22    |       | 76                        | 61    |                   | 41                          | 20    |              |

Abbreviations: NLR: neutrophil to lymphocyte ratio; MLR: monocyte to lymphocyte ratio; ALT: alanine aminotransferase; HBsAg: hepatitis B surface antigen; AFP: alpha fetoprotein; TNM: tumor node metastasis; BCLC: Barcelona clinic liver cancer.

**Supplementary Table S5: Correlation between NMLR and other inflammation associated parameters**

| Parameters |                | NMLR ( $\leq 1.2$ vs $> 1.2$ )       |          |           |                                        |          |           |
|------------|----------------|--------------------------------------|----------|-----------|----------------------------------------|----------|-----------|
|            |                | Training Cohort<br>( <i>n</i> = 256) |          |           | Validation Cohort<br>( <i>n</i> = 131) |          |           |
|            |                | <i>n</i>                             | <i>r</i> | <i>p</i>  | <i>n</i>                               | <i>r</i> | <i>P</i>  |
| CRP        | $\leq 10$ mg/L | 232                                  | 0.089    | 0.154     | 114                                    | 0.095    | 0.282     |
|            | $> 10$ mg/L    | 24                                   |          |           | 17                                     |          |           |
| NLR        | $\leq 2.5$     | 118                                  | 0.513    | $< 0.001$ | 87                                     | 0.689    | $< 0.001$ |
|            | $> 2.5$        | 138                                  |          |           | 44                                     |          |           |
| MLR        | $\leq 0.3$     | 114                                  | 0.858    | $< 0.001$ | 84                                     | 0.714    | $< 0.001$ |
|            | $> 0.3$        | 142                                  |          |           | 47                                     |          |           |
| GPS        | 0              | 231                                  | 0.129    | 0.039     | 111                                    | 0.168    | 0.042     |
|            | 1/2            | 25                                   |          |           | 20                                     |          |           |
| PI         | 0              | 232                                  | 0.061    | 0.329     | 114                                    | 0.075    | 0.392     |
|            | 1/2            | 24                                   |          |           | 17                                     |          |           |
| PNI        | 0              | 220                                  | 0.180    | 0.004     | 114                                    | 0.221    | 0.011     |
|            | 1              | 36                                   |          |           | 17                                     |          |           |

Abbreviations: NMLR: neutrophil and monocyte to lymphocyte ratio; CRP: C-reactive protein; NLR: neutrophil to lymphocyte ratio; MLR: monocyte to lymphocyte ratio; GPS: Glasgow prognostic score; PI: prognostic index; PNI: prognostic nutritional index.

**Supplementary Table S6: Correlation between iMLR and clinicopathological characteristics of patients in the training and validation cohorts**

| Characteristics           |            | iMLR                              |         |          |                                     |         |          |
|---------------------------|------------|-----------------------------------|---------|----------|-------------------------------------|---------|----------|
|                           |            | Training Cohort ( <i>n</i> = 256) |         |          | Validation Cohort ( <i>n</i> = 131) |         |          |
|                           |            | $\leq 1.1$                        | $> 1.1$ | <i>P</i> | $\leq 1.1$                          | $> 1.1$ | <i>P</i> |
| Age (year)                | $\leq 50$  | 52                                | 55      | 0.900    | 24                                  | 38      | 0.114    |
|                           | $> 50$     | 71                                | 78      |          | 37                                  | 32      |          |
| Gender                    | Female     | 22                                | 20      | 0.613    | 52                                  | 61      | 0.803    |
|                           | Male       | 101                               | 113     |          | 9                                   | 9       |          |
| ALT (U/L)                 | $\leq 40$  | 67                                | 69      | 0.708    | 33                                  | 36      | 0.861    |
|                           | $> 40$     | 56                                | 64      |          | 28                                  | 34      |          |
| Liver cirrhosis           | Yes        | 112                               | 111     | 0.092    | 60                                  | 63      | 0.067    |
|                           | No         | 11                                | 22      |          | 1                                   | 7       |          |
| HBsAg                     | Positive   | 103                               | 105     | 0.341    | 55                                  | 61      | 0.784    |
|                           | Negative   | 20                                | 28      |          | 6                                   | 9       |          |
| AFP (ng/ml)               | $\leq 20$  | 50                                | 52      | 0.898    | 16                                  | 30      | 0.066    |
|                           | $> 20$     | 73                                | 81      |          | 45                                  | 40      |          |
| Platelet count<br>(109/L) | $\leq 100$ | 32                                | 24      | 0.133    | 22                                  | 19      | 0.345    |
|                           | $> 100$    | 91                                | 109     |          | 39                                  | 51      |          |
| Tumor number              | Single     | 108                               | 114     | 0.713    | 56                                  | 62      | 0.574    |
|                           | Multiple   | 15                                | 19      |          | 5                                   | 8       |          |
| Vascular invasion         | Yes        | 34                                | 47      | 0.226    | 7                                   | 11      | 0.613    |
|                           | No         | 89                                | 86      |          | 54                                  | 59      |          |
| Tumor differentiation     | I-II       | 91                                | 101     | 0.773    | 42                                  | 53      | 0.435    |
|                           | III-IV     | 32                                | 32      |          | 19                                  | 17      |          |
| Tumor encapsulation       | Yes        | 68                                | 73      | 1.000    | 29                                  | 36      | 0.727    |
|                           | No         | 55                                | 60      |          | 32                                  | 34      |          |

|                 |        |    |    |              |    |    |              |
|-----------------|--------|----|----|--------------|----|----|--------------|
| Tumor size (cm) | ≤ 5.0  | 85 | 87 | 0.595        | 45 | 43 | 0.142        |
|                 | > 5.0  | 38 | 46 |              | 16 | 27 |              |
| TNM stage       | I      | 83 | 94 | 0.591        | 47 | 40 | <b>0.026</b> |
|                 | II-III | 40 | 39 |              | 14 | 30 |              |
| BCLC stage      | 0/A    | 66 | 53 | <b>0.033</b> | 39 | 31 | <b>0.035</b> |
|                 | B/C    | 57 | 80 |              | 22 | 39 |              |

Abbreviations: iMLR: intratumoral CD16/CD8 ratio; ALT: alanine aminotransferase; HBsAg: hepatitis B surface antigen; AFP: alpha fetoprotein; TNM: tumor node metastasis; BCLC: Barcelona clinic liver cancer.

**Supplementary Table S7: The area under the receiver operating characteristic curve (AUROC) of patients in the training and validation cohorts**

| Characteristics              |           | AUROC (95% CI)            |               |                             |               |
|------------------------------|-----------|---------------------------|---------------|-----------------------------|---------------|
|                              |           | Training Cohort (n = 256) |               | Validation Cohort (n = 131) |               |
|                              |           | RFS                       | OS            | RFS                         | OS            |
| AFP (ng/ml)                  | ≤ 20      | 0.568                     | 0.557         | 0.458                       | 0.603         |
|                              | > 20      | (0.497–0.639)             | (0.483–0.632) | (0.359–0.558)               | (0.498–0.708) |
| Tumor number                 | Single    | 0.533                     | 0.552         | 0.524                       | 0.510         |
|                              | Multiple  | (0.462–0.603)             | (0.475–0.629) | (0.425–0.624)               | (0.397–0.623) |
| Vascular invasion            | Yes       | 0.564                     | 0.592         | 0.511                       | 0.562         |
|                              | No        | (0.493–0.634)             | (0.517–0.668) | (0.411–0.611)               | (0.447–0.678) |
| Tumor differentiation        | I/II      | 0.551                     | 0.544         | 0.444                       | 0.507         |
|                              | III/IV    | (0.481–0.622)             | (0.468–0.621) | (0.343–0.544)               | (0.395–0.620) |
| Tumor encapsulation          | Yes       | 0.533                     | 0.529         | 0.441                       | 0.546         |
|                              | No        | (0.462–0.604)             | (0.453–0.604) | (0.341–0.541)               | (0.435–0.658) |
| Tumor size (cm)              | ≤ 5.0     | 0.582                     | 0.654         | 0.537                       | 0.685         |
|                              | > 5.0     | (0.512–0.652)             | (0.581–0.728) | (0.437–0.637)               | (0.578–0.793) |
| TNM stage                    | I         | 0.533                     | 0.616         | 0.591                       | 0.641         |
|                              | II/III    | (0.462–0.604)             | (0.541–0.691) | (0.493–0.688)               | (0.531–0.752) |
| BCLC stage                   | 0/A       | 0.611                     | 0.651         | 0.564                       | 0.709         |
|                              | B/C       | (0.541–0.680)             | (0.581–0.722) | (0.464–0.663)               | (0.610–0.808) |
| MLR                          | ≤ 0.3     | 0.569                     | 0.620         | 0.657                       | 0.626         |
|                              | > 0.3     | (0.499–0.640)             | (0.547–0.694) | (0.564–0.751)               | (0.515–0.736) |
| NLR                          | ≤ 2.5     | 0.551                     | 0.613         | 0.700                       | 0.622         |
|                              | > 2.5     | (0.480–0.622)             | (0.540–0.685) | (0.610–0.789)               | (0.510–0.733) |
| NMLR                         | ≤ 1.2     | 0.593                     | 0.700         | 0.733                       | 0.691         |
|                              | > 1.2     | (0.523–0.663)             | (0.631–0.769) | (0.648–0.819)               | (0.583–0.798) |
| iMLR                         | ≤ 1.1     | 0.620                     | 0.574         | 0.686                       | 0.642         |
|                              | > 1.1     | (0.551–0.690)             | (0.500–0.648) | (0.593–0.779)               | (0.538–0.747) |
| Combination of NMLR and iMLR | both low  | 0.646                     | 0.723         | 0.818                       | 0.755         |
|                              | both high | (0.579–0.714)             | (0.656–0.789) | (0.746–0.889)               | (0.665–0.845) |

Abbreviations: RFS: recurrence-free survival; OS: overall survival; NMLR: neutrophil and monocyte to lymphocyte ratio; MLR: monocyte to lymphocyte ratio; NLR: neutrophil to lymphocyte ratio; iMLR: intratumoral CD16/CD8 ratio; AFP: alpha fetoprotein; TNM: tumor node metastasis; BCLC: Barcelona clinic liver cancer.
